# Supplementary material
Source: Springer Nature journal article supplement (https://www.springermedizin.de/resource/supplementary/13058_2010_2756_MOESM10_ESM.pdf/9702090)

**(A)**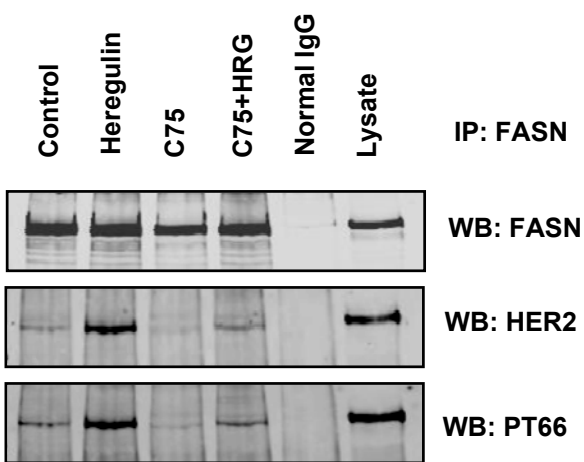

SKBR3 cells

**(B)**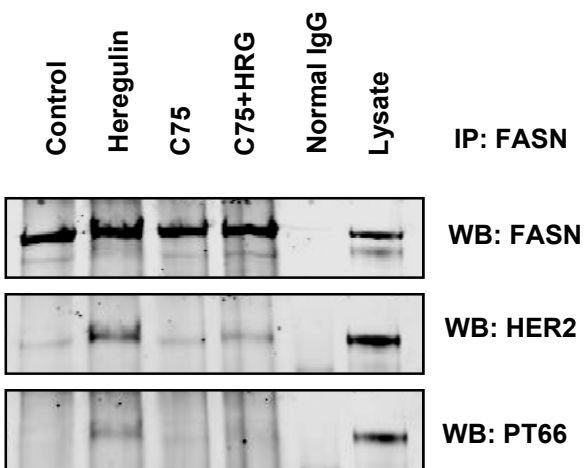

BT474 cells

**(C)**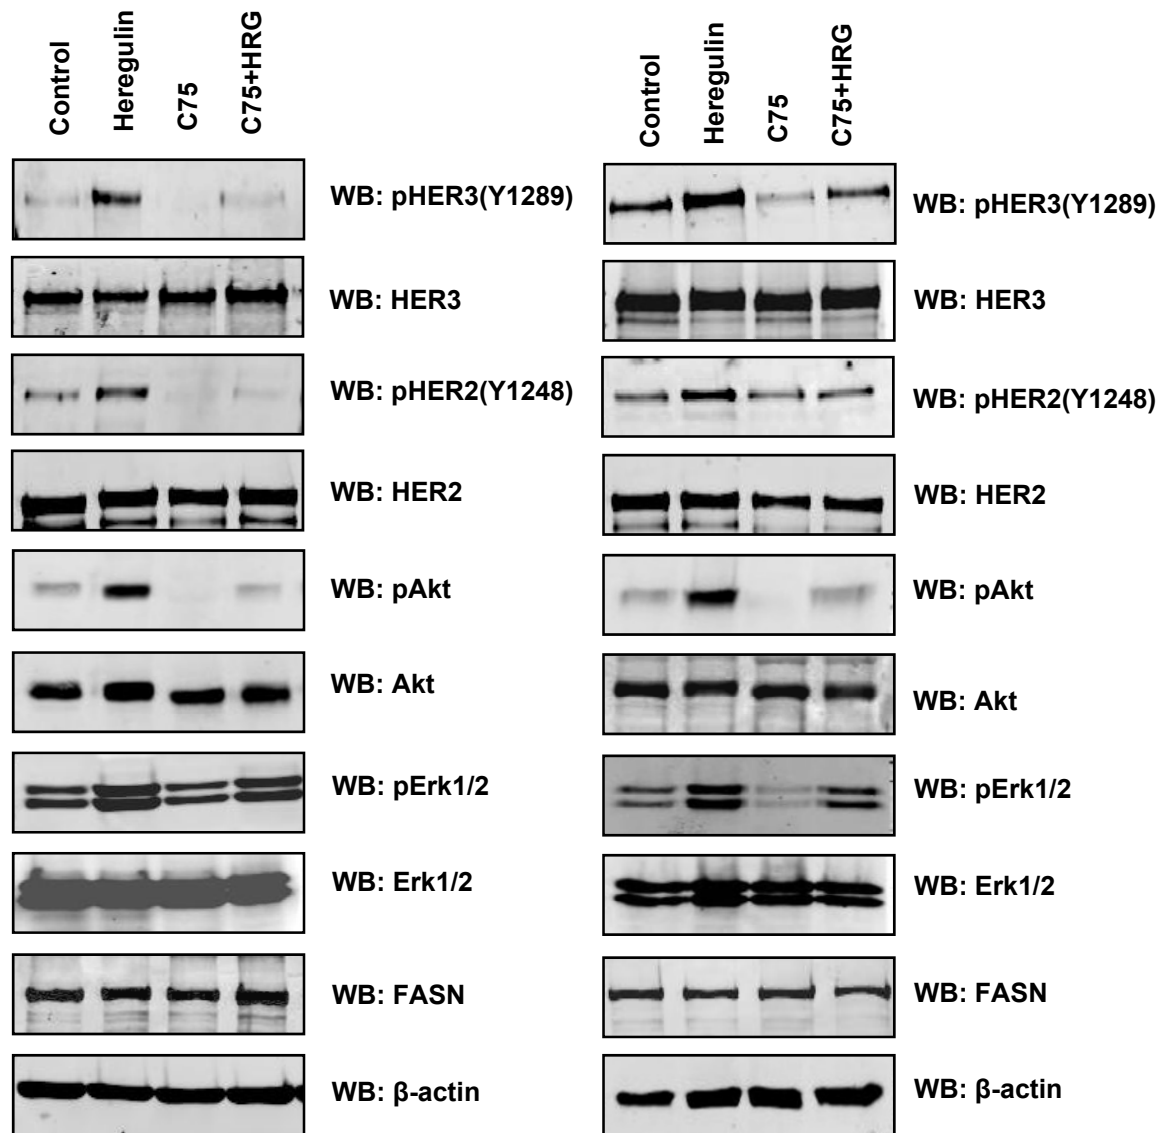

SKBR3 cells

BT474 cells

Supplement: MOESM10 [file 9702090]
